# Supplementary material
Source: bioRxiv or medRxiv preprint supplement (https://www.biorxiv.org/highwire/filestream/96629/field_highwire_adjunct_files/3/314922-12.pdf)
Supplement: Supplementary file [file 314922-12.pdf]

| Calculated TI<br>Feedrate (mmol/g/h) | Pulsing system | Initial OD<br>from fit | Lag time from<br>fit (min) | Threshold<br>linear fit R <sup>2</sup> | Linear growth rate<br>after lag (1/h) | Pulse freq. <sup>-1</sup><br>(minutes) | Total glucose fed<br>during lag (mmol/g) |
|--------------------------------------|----------------|------------------------|----------------------------|----------------------------------------|---------------------------------------|----------------------------------------|------------------------------------------|
| 0.215                                | Plate reader   | 0.70                   | 260.16                     | 0.607                                  | 0.021                                 | 9.98                                   | 0.93                                     |
| 0.246                                | Spin flask     | 0.79                   | 270.00                     | 0.852                                  | 0.021                                 | 7.67                                   | 1.11                                     |
| 0.319                                | Plate reader   | 0.78                   | 152.81                     | 0.974                                  | 0.030                                 | 5.99                                   | 0.81                                     |
| 0.337                                | Spin flask     | 1.11                   | 113.97                     | 0.882                                  | 0.025                                 | 4.00                                   | 0.64                                     |
| 0.371                                | Plate reader   | 0.74                   | 121.00                     | 0.965                                  | 0.039                                 | 5.49                                   | 0.75                                     |
| 0.400                                | Plate reader   | 0.75                   | 101.02                     | 0.976                                  | 0.038                                 | 4.99                                   | 0.67                                     |
| 0.453                                | Plate reader   | 0.78                   | 56.28                      | 0.985                                  | 0.039                                 | 4.24                                   | 0.43                                     |
| 0.476                                | Spin flask     | 0.74                   | 93.89                      | 0.955                                  | 0.030                                 | 4.25                                   | 0.75                                     |
| 0.525                                | Spin flask     | 0.68                   | 81.85                      | 0.938                                  | 0.032                                 | 4.17                                   | 0.72                                     |
| 0.583                                | Plate reader   | 0.74                   | 49.22                      | 0.987                                  | 0.059                                 | 3.49                                   | 0.48                                     |
| 0.605                                | Spin flask     | 0.83                   | 67.86                      | 0.987                                  | 0.044                                 | 3.00                                   | 0.68                                     |
| 0.648                                | Spin flask     | 0.92                   | 55.00                      | 0.996                                  | 0.045                                 | 2.50                                   | 0.59                                     |
| 0.699                                | Plate reader   | 0.78                   | 33.75                      | 0.983                                  | 0.066                                 | 2.75                                   | 0.39                                     |
| 0.782                                | Spin flask     | 0.70                   | 0.00                       | 0.953                                  | 0.044                                 | 2.75                                   | 0.00                                     |
| 0.883                                | Spin flask     | 0.85                   | 30.00                      | 0.970                                  | 0.048                                 | 2.00                                   | 0.44                                     |
| 1.026                                | Plate reader   | 0.63                   | 0.00                       | 0.961                                  | 0.092                                 | 2.31                                   | 0.00                                     |
| 1.097                                | Spin flask     | 0.82                   | 0.00                       | 0.914                                  | 0.041                                 | 1.67                                   | 0.00                                     |
| 1.237                                | Spin flask     | 0.69                   | 0.00                       | 0.962                                  | 0.059                                 | 1.75                                   | 0.00                                     |
